# Supplementary material
Source: publisher figshare collection journal article supplement (https://frontiersin.figshare.com/ndownloader/files/24765323)

## Prokaryotic-type ABC transporters

## Mineral and organic ion transporters

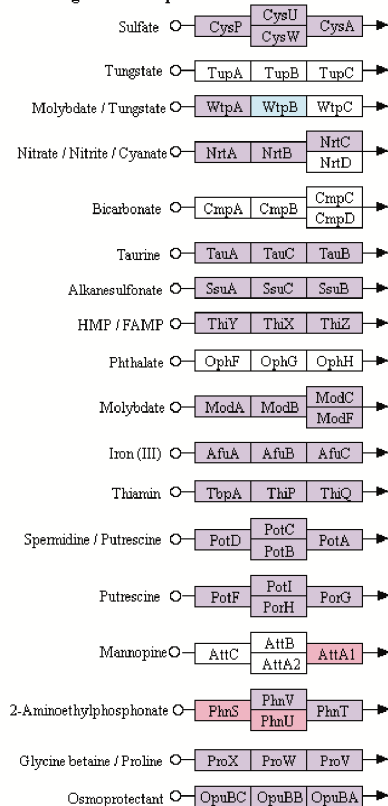

## Oligosaccharide, polyol, and lipid transporters

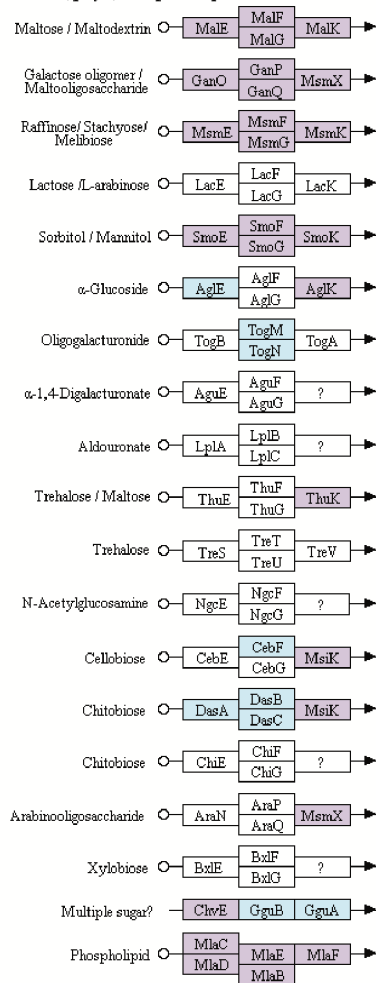

## Phosphate and amino acid transporters

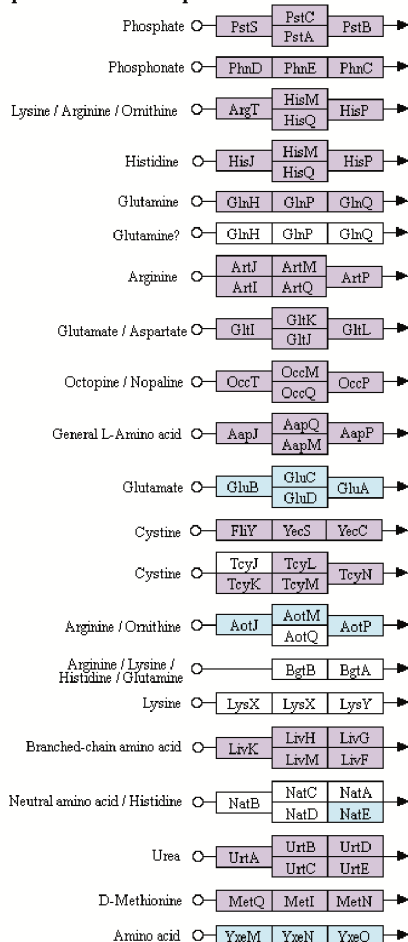

## Peptide and nickel transporters

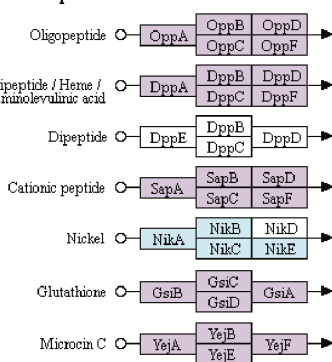

## Metallic cation, iron-siderophore and vitamin B12 transporters

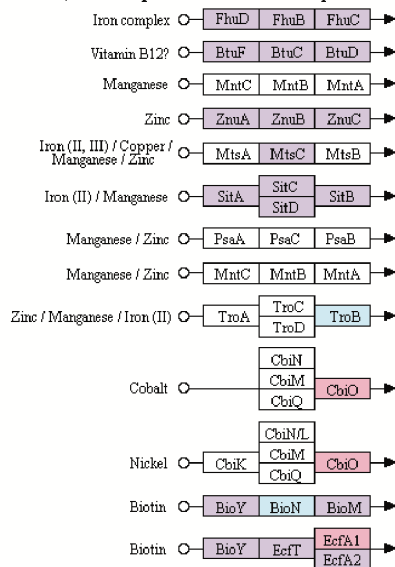

## ABC-2 and other transporters

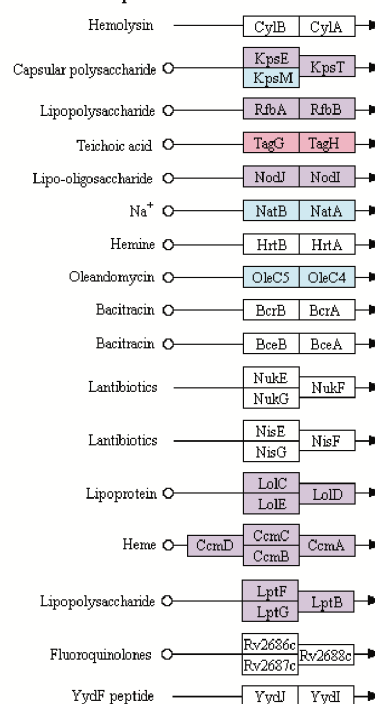

## ABC-2 -type components without transporting function

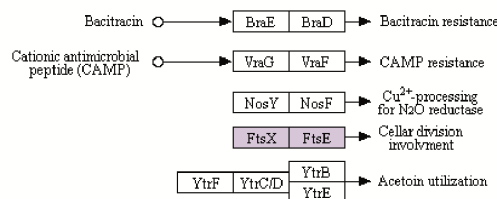

## Monosaccharide transporters

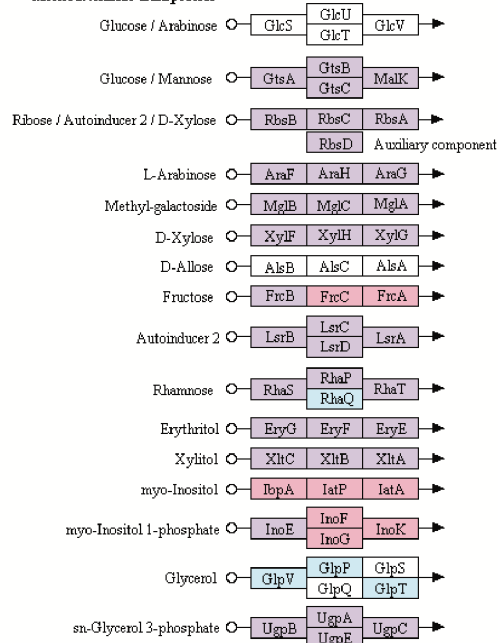

Supplement: Supplementary file [file 24765323]
